# Supplementary material for: Genetic variants in lncRNA H19 are associated with the risk of oral squamous cell carcinoma in a Chinese population
Source: PubMed Central journal article supplement (PMC5963630; doi:10.18632/oncotarget.23673), 2018-01-02
Supplement: oncotarget-09-23915-s001.pdf [file oncotarget-09-23915-s001.pdf]

## Genetic variants in lncRNA *H19* are associated with the risk of oral squamous cell carcinoma in a Chinese population

### SUPPLEMENTARY MATERIALS

**Supplementary Table 1: Cumulative effect of rs217727 and rs2839701 on the risk of OSCC**

| No. of risk allele <sup>a</sup> | Case<br>N (%) | Control<br>N (%) | Adjust OR (95%CI) <sup>b</sup> | P <sup>b</sup>   |
|---------------------------------|---------------|------------------|--------------------------------|------------------|
| 0                               | 53 (12.30)    | 186 (18.90)      | 1                              |                  |
| 1                               | 178 (41.30)   | 475 (48.27)      | 1.36 (0.95-1.93)               | 0.090            |
| 2-3                             | 200 (46.40)   | 323 (32.83)      | <b>2.22 (1.56-3.16)</b>        | <b>&lt;0.001</b> |
| Trend                           |               |                  | <b>1.53 (1.29-1.81)</b>        | <b>&lt;0.001</b> |
| Binary classification           |               |                  |                                |                  |
| 0-1                             | 231 (53.60)   | 661 (67.17)      |                                |                  |
| 2-3                             | 200 (46.40)   | 323 (32.83)      | <b>1.76 (1.40-2.23)</b>        | <b>&lt;0.001</b> |

<sup>a</sup>The rs217727T and rs2839701G were assumed as risk alleles based on main effect of individual locus.

<sup>b</sup>Derived from additive model using logistic regression analyses with an adjustment for age, sex, smoking and drinking status.

**Supplementary Table 2: Stratified analyses of association between SNPs and OSCC**

| Variables | rs217727         |                     | Adjusted OR <sup>a</sup><br>(95% CI) | P <sup>a</sup> | rs2839701        |                     | Adjusted OR <sup>a</sup><br>(95%CI) | P <sup>a</sup> |
|-----------|------------------|---------------------|--------------------------------------|----------------|------------------|---------------------|-------------------------------------|----------------|
|           | Case<br>CC/CT/TT | Control<br>CC/CT/TT |                                      |                | Case<br>CC/CG/GG | Control<br>CC/CG/GG |                                     |                |
| Age, yr   |                  |                     |                                      |                |                  |                     |                                     |                |
| <60       | 82/94/20         | 203/196/29          | 1.29 (0.98–1.69)                     | 0.066          | 100/82/21        | 213/189/26          | 1.11 (0.85–1.45)                    | 0.444          |
| ≥60       | 104/100/31       | 285/227/44          | <b>1.35 (1.07–1.70)</b>              | <b>0.011</b>   | 105/106/30       | 294/213/49          | <b>1.33 (1.06–1.67)</b>             | <b>0.014</b>   |
| Sex       |                  |                     |                                      |                |                  |                     |                                     |                |
| Females   | 77/85/26         | 219/214/32          | <b>1.38 (1.06–1.80)</b>              | <b>0.017</b>   | 89/80/26         | 251/186/28          | <b>1.47 (1.13–1.90)</b>             | <b>0.004</b>   |
| Males     | 109/109/25       | 269/209/41          | <b>1.31 (1.03–1.66)</b>              | <b>0.028</b>   | 116/108/25       | 256/216/47          | 1.07 (0.85–1.36)                    | 0.547          |
| Smoking   |                  |                     |                                      |                |                  |                     |                                     |                |
| Never     | 107/118/33       | 309/285/47          | <b>1.34 (1.07–1.67)</b>              | <b>0.011</b>   | 122/114/29       | 333/266/42          | <b>1.29 (1.03–1.61)</b>             | <b>0.026</b>   |
| Ever      | 79/76/18         | 179/138/26          | 1.30 (0.97–1.75)                     | 0.076          | 83/74/22         | 174/136/33          | 1.15 (0.87–1.52)                    | 0.317          |
| Drinking  |                  |                     |                                      |                |                  |                     |                                     |                |
| Never     | 104/116/33       | 321/308/51          | <b>1.32 (1.06–1.65)</b>              | <b>0.015</b>   | 124/106/30       | 355/278/47          | <b>1.25 (1.00–1.56)</b>             | <b>0.047</b>   |
| Ever      | 82/78/18         | 167/115/22          | <b>1.36 (1.01–1.82)</b>              | <b>0.041</b>   | 81/82/21         | 152/124/28          | 1.19 (0.90–1.57)                    | 0.223          |

<sup>a</sup>Derived from additive model using logistic regression analyses with an adjustment for age, sex, smoking and drinking status.

**Supplementary Table 3: Heterogeneity test for rs217727 and rs2839701**

| Heterogeneity-test | rs217727 | rs2839701 |
|--------------------|----------|-----------|
| age                |          |           |
| p                  | 0.803    | 0.312     |
| I2(%)              | 0.0      | 2.1       |
| sex                |          |           |
| p                  | 0.775    | 0.076     |
| I2(%)              | 0.0      | 68.3      |
| smoke              |          |           |
| p                  | 0.872    | 0.529     |
| I2(%)              | 0.0      | 0.0       |
| drink              |          |           |
| p                  | 0.874    | 0.787     |
| I2(%)              | 0.0      | 0.0       |

<sup>a</sup>for heterogeneity test based on  $\chi^2$ -based *Q*-test.
